# Supplementary material
Source: publisher figshare collection journal article supplement (https://sage.figshare.com/ndownloader/files/17478578)
Supplement: Supplementary file 1 [file 17478578]

Supplementary File 1  
Realist Evaluation Stages and Data Sources

| Stages                                 | Secondary data and process                                                                                                                            |
|----------------------------------------|-------------------------------------------------------------------------------------------------------------------------------------------------------|
| Stage 1: Confirm the context of the RG | A review of 2004 baseline survey (Table 1), documentation                                                                                             |
| Stage 2: Code data                     | Coding of data from survey (2007), focus groups (2005, 2008), listener feedback obtained in 2006, 2009 (Table 1)                                      |
| State 3: Create CMO configurations     | CMO configurations drafted by (co-author's name removed for blind peer review), discussed and refined by all authors in successive rounds of feedback |
